# Supplementary material
Source: Research Square preprint supplement (doi:10.21203/rs.3.rs-8960490/v1)
Supplement: Supplementary file 1 [file 06302e1f16d9fd55841ef613.docx]

**Table 1. Prevalence and outcome of surgically managed congenital anomalies among NICU admissions**

| **Characteristic** | **Value** |
| --- | --- |
| Total NICU admissions | 8,015 |
| Neonates with congenital anomalies | 104 (1.3%) |
| Rate per 1,000 NICU admissions | 13.0 |
| Mortality among CA cases | 20 (19.2%) |

*Values are presented as n (%) unless otherwise stated.*

**Table 2. Sex distribution of neonates with congenital anomalies**

| **Sex** | **n** | **%** |
| --- | --- | --- |
| Male | 59 | 56.7 |
| Female | 42 | 40.4 |
| Ambiguous genitalia | 3 | 2.9 |
| **Total** | **104** | **100** |

**Table 3. Birth weight distribution**

| **Birth weight (kg)** | **n** | **%** |
| --- | --- | --- |
| <1.5 | 8 | 7.7 |
| 1.5–2.0 | 19 | 18.3 |
| 2.1–2.5 | 18 | 17.3 |
| 2.6–4.0 | 57 | 54.8 |
| >4.0 | 1 | 1.0 |
| **Total** | **104** | **100** |

**Table 4. Gestational age distribution**

| **Gestational age (weeks)** | **n** | **%** |
| --- | --- | --- |
| <28 | 5 | 4.8 |
| 28–33 | 14 | 13.5 |
| 34–36 | 33 | 31.7 |
| 37–40 | 39 | 37.5 |
| >40 | 13 | 12.5 |
| **Total** | **104** | **100** |

**Table 5. Distribution of congenital anomaly types**

| **Anomaly category/type** | **n** | **%** |
| --- | --- | --- |
| Gastrointestinal anomalies | 70 | 67.3 |
| – Hirschsprung’s disease / meconium plug | 22 | 21.2 |
| – Anterior abdominal wall defects | 20 | 19.2 |
| – Anorectal malformations | 12 | 11.5 |
| – Jejunoileal atresia | 11 | 10.6 |
| – Duodenal atresia | 6 | 5.8 |
| – Malrotation | 6 | 5.8 |
| – Oesophageal atresia | 5 | 4.8 |
| Genitourinary anomalies | 4 | 3.8 |
| Other anomalies* | 16 | 15.4 |
| Associated/multiple anomalies | 13 | 12.5 |

*Includes congenital diaphragmatic hernia, hydronephrosis, and others.
*Percentages exceed 100% due to multiple anomalies in some neonates.*

**Table 6. Maternal risk factors associated with congenital anomalies**

| **Risk factor** | **OR** | **95% CI** | **p value** |
| --- | --- | --- | --- |
| Maternal age >35 years | 2.3 | 1.14–4.63 | 0.02 |
| No periconceptional folic acid | 2.9 | 1.27–6.62 | 0.01 |
| Non-facility-based delivery | 3.5 | 1.47–8.33 | <0.01 |

**Table 7. Types of Anorectal Malformation**

| **ARM** |  | **Total** |
| --- | --- | --- |
| With recto vestibular fistula |  | 3 |
| With rectoperineal fistula |  | 1 |
| With rectourethral fistula |  | 3 |
| No fistula |  | 5 |

**Table 8. Breakdown of causes of death**

| **Cause of death** |  | **Total** |
| --- | --- | --- |
| Prematurity/low birthweight with respiratory distress syndrome (RDS) |  | 3 |
| Sepsis and malnutrition secondary to Gastroschisis |  | 5 |
| Respiratory failure secondary to aspiration pneumonia in oesophageal atresia patients |  | 3 |
| Post surgery short bowel syndrome (jejunal atresia cases) |  | 3 |
| Multiple anomalies (ARM with aneuploidy, OA with CHD, OA with duodenal atresia and IUGR) |  | 4 |
| Meconium peritonitis |  | 1 |
| Severe renal impairment in a case of PUV |  | 1 |
